# Supplementary material for: Comparative Expression Analysis of Rice and Arabidopsis Peroxiredoxin Genes Suggests Conserved or Diversified Roles Between the Two Species and Leads to the Identification of Tandemly Duplicated Rice Peroxiredoxin Genes Differentially Expressed in Seeds
Source: PubMed Central journal article supplement (PMC5483221; doi:10.1186/s12284-017-0170-5), 2017-06-24
Supplement: 12284_2017_170_MOESM12_ESM.pdf [file 12284_2017_170_MOESM12_ESM.pdf]

Blast2 alignment of LOC\_0s07g44430 and LOC\_0s07g44440

| Score            | Expect       | Method                                                        | Identities   | Positives    | Gaps      | Frame |
|------------------|--------------|---------------------------------------------------------------|--------------|--------------|-----------|-------|
| 379<br>bits(973) | 1e-<br>138() | Compositional matrix<br>adjust.                               | 177/219(81%) | 197/219(89%) | 0/219(0%) |       |
| Features:        |              |                                                               |              |              |           |       |
| LOC_0s07g44430   | 1            | MPGLTLGDVVPDLELDTTHGKIRLHDFVGDYVIFSHPADFTPVCTTELESEMAGYAGEF   |              |              |           | 60    |
|                  |              | MPGLT+GD VP+LELD+THGKIR+HDFVGD YVI+FSHP DFTPVCTTEL+ MAGYA EF  |              |              |           |       |
| LOC_0s07g44440   | 1            | MPGLTIGDTPNLELDSTHGKIRIHDFVGDYVILFSHPGDFTPVCTTELAAMAGYAKEF    |              |              |           | 60    |
| LOC_0s07g44430   | 61           | DKRGVKLLGFSCDDVESHKDWIKDIEAYKPGRRVGFPIVADPDREAIRQLNMIDAEKDT   |              |              |           | 120   |
|                  |              | DKRGVKLLG SCDDV+SHKDWIKDIEAYKPG RV +PI+ADP REAI+QLNM+D DEKD+  |              |              |           |       |
| LOC_0s07g44440   | 61           | DKRGVKLLGISCDDVQSHKDWIKDIEAYKPGNRVTYPI MADPSREAIKQLNMVDPDEKDS |              |              |           | 120   |
| LOC_0s07g44430   | 121          | AGGELPNRALHIVGPDKKVKSFLFPACTGRNMAEVL RATDALLTAARHRVATPVNWKPG  |              |              |           | 180   |
|                  |              | GG LP+RALHIVGPDKKVKSFL+PAC GRNM EV+RA DAL TAA+H VATPVNWKPG    |              |              |           |       |
| LOC_0s07g44440   | 121          | NGGHLPSRALHIVGPDKKVKSFLYPACVGRNMDEVVRAVDALQTA AKHAVATPVNWKPG  |              |              |           | 180   |
| LOC_0s07g44430   | 181          | ERVVIPPVGSDEEAKARFPAGFETAQLPSNKCYLRFTQV                       |              | 219          |           |       |
|                  |              | ERVVIPPVGSDEEAK +FP GF+TA LPS K YLRFT+V                       |              |              |           |       |
| LOC_0s07g44440   | 181          | ERVVIPPVGSDEEAK EKFPQGFDTADLPSGKGYLRFTKV                      |              | 219          |           |       |
